# Supplementary material for: Interventions to treat cutaneous leishmaniasis in children: A systematic review
Source: PubMed Central journal article supplement (PMC6310290; doi:10.1371/journal.pntd.0006986), 2018-12-14
Supplement: pntd.0006986.s001.pdf [file pntd.0006986.s001.pdf]

## **S1 File. Search strategies used in the electronic databases.**

- 1. PubMed:** (Cutaneous AND leishman\*) AND (treatment OR management OR Therapy) AND (outcome\* OR cure OR failure) AND (infant [MeSH] OR child[MeSH] OR adolescent[MeSH]).
- 2. Cochrane Central Register of Controlled Trials**(Cutaneous and leishman\*) and (treatment or management or Therapy) and (outcome\* or cure or failure) and (infant or child or adolescent) in Trials in the strategy currently being edited
- 3. LILACS:** (tw:(cutaneous AND leishman\*)) AND (tw:(therapy OR treatment OR management)) AND (tw:(outcome OR cure OR failure)) AND (tw:(pediatric OR children OR adolescent)) AND (instance:"regional") AND (instance:"regional") AND (db:("LILACS" OR "MedCarib") AND la:("en" OR "pt" OR "es"))
- 4. Scopus:** (TITLE-ABS-KEY (cutaneous AND leishman\*) AND TITLE-ABS-KEY (treatment OR management OR therapy) AND TITLE-ABS-KEY (outcome\* OR cure OR failure) AND TITLE-ABS-KEY (infant OR child OR adolescent)) AND (LIMIT-TO (DOCTYPE, "ar")) AND (LIMIT-TO (SUBJAREA, "MEDI")) AND (LIMIT-TO (LANGUAGE, "English") OR LIMIT-TO (LANGUAGE, "Portuguese") OR LIMIT-TO (LANGUAGE, "Spanish"))
- 5. SciELO:** ((cutaneous) AND (Leishman\*)) AND ((management) OR (therapy) OR (treatment)) AND ((adolescent) OR (children) OR (infant)).
- 6. Web of Science:** (Cutaneous AND leishman\* AND ('treatment'/exp OR treatment OR 'management'/exp OR management OR 'therapy'/exp OR therapy) AND (outcome\* OR 'cure'/exp OR cure OR 'failure'/exp OR failure) AND ('infant'/exp OR infant OR 'child'/exp OR child OR 'adolescent'/exp OR adolescent)) Timespan: All years.
- 7. Clinical Trials:** cutaneous leishmaniasis | cutaneous | Child
- 8. Google Scholar (for gray literature):** **With all of the words:** leishmaniasis or leishmania and children. **With exact phrase:** clinical trial or clinical trials or randomized or randomised or trial or cohort or control. **With at least one of the words:** treatment therapy efficacy therapeutics management. **Without the words:** visceral mucosal mucocutaneous case series reports murine mice dogs canine vitro polymerase IL Polymorphism immune vector. **Complete search:** leishmaniasis or leishmania and children treatment OR therapy OR efficacy OR therapeutics OR management "cutaneous leishmaniasis" -visceral -mucosa -mucocutaneous -case -series -reports -murine -mice -dogs -canine -vitro -polymerase -IL -Polymorphism -vector.
