# Supplementary material for: Interventions to treat cutaneous leishmaniasis in children: A systematic review
Source: PubMed Central journal article supplement (PMC6310290; doi:10.1371/journal.pntd.0006986), 2018-12-14
Supplement: pntd.0006986.s003.pdf [file pntd.0006986.s003.pdf]

**S1 Table. Supplementary table 1. Risk of Bias assessment for randomized studies.**

| Type of CL / Study           | Random generation of allocation sequence (selection bias)     | Allocation concealment (selection bias)          | Blinding of participants and personnel for all outcomes (performance bias)                                                          | Blinding of outcome assessment for main outcome (detection bias)         | Incomplete outcome data for all outcomes                                                           | Selective reporting of outcomes                                     | Other source of bias                                                                                                          |
|------------------------------|---------------------------------------------------------------|--------------------------------------------------|-------------------------------------------------------------------------------------------------------------------------------------|--------------------------------------------------------------------------|----------------------------------------------------------------------------------------------------|---------------------------------------------------------------------|-------------------------------------------------------------------------------------------------------------------------------|
| <b>ACL</b>                   |                                                               |                                                  |                                                                                                                                     |                                                                          |                                                                                                    |                                                                     |                                                                                                                               |
| <b>Castro MdM, et al.</b>    | Not applicable for this study design                          | Not applicable for this study design             | Not applicable for this study design                                                                                                | Not applicable for this study design                                     | <b>Low:</b> Low proportion of lost to follow-up in both groups.                                    | <b>Low:</b> Protocol registered in clinicaltrials.gov, NCT01462500  | <b>Unclear:</b> Study design to assess PK of miltefosine, not powered to assess efficacy.                                     |
| <b>Chrusiack-T A, et al.</b> | <b>Low:</b> used StataCorp LP 9 for randomization sequence.   | <b>Unclear:</b> not described in the manuscript. | <b>High:</b> open label trial. Evaluators or participants were not masked.                                                          | <b>Unclear:</b> for the secondary outcome (Adverse events).              | <b>Low:</b> Low proportion of patients lost to follow-up or excluded from the analysis.            | <b>Low:</b> Protocol registered in clinicaltrials.gov, NCT00600548. | <b>Unclear:</b> Results for children estimated as part of a subgroup analysis, not considered in the sample size calculation. |
| <b>Machado P, et al.</b>     | <b>Low:</b> Used a computer-based randomization table         | <b>Unclear:</b> not described.                   | <b>High:</b> Participants knew intervention assignment due to the characteristics of the drugs (parenteral vs oral administration). | <b>Low:</b> Two clinicians masked for the study intervention evaluation. | <b>Low:</b> Low proportion of lost to follow-up.                                                   | <b>Low:</b> Protocol registered in clinicaltrials.gov, NCT00600548. | <b>Unclear:</b> Results for children estimated as part of a subgroup analysis, not considered in the sample size calculation. |
| <b>Palacios R, et al.</b>    | <b>Low:</b> Used permuted block randomization.                | <b>Unclear:</b> Method not described.            | <b>High:</b> Blinding not possible, due to ethical considerations.                                                                  | <b>Low:</b> Masking assessors with respect to the study group.           | <b>High:</b> High proportion of non-adherence and lost to follow-up: 41%                           | <b>Unclear:</b> Study protocol is unavailable.                      | <b>Unclear:</b> Results for children estimated as part of a subgroup analysis, not considered in the sample size calculation. |
| <b>Rubiano LC, et al.</b>    | <b>Low:</b> Computerized balanced block randomization scheme. | <b>Low:</b> Coordinating center via phone call.  | <b>High:</b> Open label trial. Authors acknowledge the ethical issues of using placebo in this study.                               | <b>Low:</b> Assessors were blinded of the study intervention.            | <b>Low:</b> Low proportion of lost to follow-up/withdrawals (only 2 and 3 per group) in the study. | <b>Low:</b> Protocol registered in clinicaltrials.gov, NCT00487253. | <b>Low.</b>                                                                                                                   |
| <b>OWCL</b>                  |                                                               |                                                  |                                                                                                                                     |                                                                          |                                                                                                    |                                                                     |                                                                                                                               |

|                       |                                                                                                            |                                                                       |                                                                                                                                                      |                                                                                                           |                                                                                                                                      |                                                                                                                                                                                                                                 |                                                                                                                                                     |
|-----------------------|------------------------------------------------------------------------------------------------------------|-----------------------------------------------------------------------|------------------------------------------------------------------------------------------------------------------------------------------------------|-----------------------------------------------------------------------------------------------------------|--------------------------------------------------------------------------------------------------------------------------------------|---------------------------------------------------------------------------------------------------------------------------------------------------------------------------------------------------------------------------------|-----------------------------------------------------------------------------------------------------------------------------------------------------|
| Jaffar H.             | <b>Unclear:</b> No details regarding the sequence generation process.                                      | <b>Unclear:</b> no described how they did the allocation concealment. | <b>Unclear:</b> Double-blind study, although there is a low risk of unblinding, due to the color in the urine associated with the use of rifampicin. | <b>Unclear:</b> Described as double-blind, but there are no details of blinding of the outcome assessors. | <b>High:</b> A higher frequency of lost to follow-up in the control group, compared to the intervention (Follow-up: 73.9% vs 43.7%). | <b>Unclear:</b> Study protocol is unavailable.                                                                                                                                                                                  | <b>High:</b> Sample size were not described. It is unclear if this sample size would allow to make inferences of the results in pediatric patients. |
| Layegh P, et al. 2009 | <b>Unclear:</b> do not describe the sequence generation process. Only described the study as "randomized". | <b>Unclear:</b> no described how they did the allocation concealment. | <b>High:</b> No blinding, due to the characteristics of the interventions.                                                                           | <b>Unclear:</b> not described if the outcome assessors were blinded.                                      | <b>Low:</b> Low proportion of loss to follow-up.                                                                                     | <b>Unclear:</b> Analysis presented as ITT and PP. The protocol with the original outcome variables is not available.                                                                                                            | <b>Low.</b>                                                                                                                                         |
| Layegh P, et al. 2011 | Not applicable for this study design                                                                       | Not applicable for this study design                                  | Not applicable for this study design                                                                                                                 | Not applicable for this study design                                                                      | <b>Low:</b> Low proportion of loss to follow-up.                                                                                     | <b>High:</b> Protocol is unavailable. Authors report the proportion of failures, a different outcome according to description in the methods (response rate, and as endpoint the definitive cure or withdrawal from the study). | <b>Low:</b> Both exposure groups have similar demographic and clinical characteristics, and the proportion of non-adherence was low.                |
