# Supplementary material for: Interventions to treat cutaneous leishmaniasis in children: A systematic review
Source: PubMed Central journal article supplement (PMC6310290; doi:10.1371/journal.pntd.0006986), 2018-12-14
Supplement: pntd.0006986.s004.pdf [file pntd.0006986.s004.pdf]

**S2 Table.**

**Supplementary table 2. Risk of bias assessment for non-randomized studies.**

| Study ref.                  | Selection                            |                                                                            |                                                                   |                                                       | Comparability                                                                              | Outcome               |                                             |                                  | NOS quality score (num. Of stars) |
|-----------------------------|--------------------------------------|----------------------------------------------------------------------------|-------------------------------------------------------------------|-------------------------------------------------------|--------------------------------------------------------------------------------------------|-----------------------|---------------------------------------------|----------------------------------|-----------------------------------|
|                             | Representativeness of exposed cohort | Selection of non-exposed cohort                                            | Ascertainment of exposure                                         | Outcome of interest was not present at start of study | Comparability of cohorts on the basis of the design or analysis controlled for confounders | Assessment of outcome | follow-up long enough for outcomes to occur | Adequacy of follow-up of cohorts |                                   |
| <b>Castro MDM, et al</b>    | *                                    | *<br>Controls (adults) drawn from the same community as the exposed cohort | *<br>Intervention (miltefosine) assigned and supervised           | *                                                     | *                                                                                          | *                     | *                                           | * 5% lost to follow-up           | <b>8</b><br><b>Good quality</b>   |
| <b>Layegh P, et al 2011</b> | *                                    | *<br>Controls (adults) drawn from the same community as the exposed cohort | *<br>Intervention (meglumine antimoniate) assigned and supervised | *                                                     | *                                                                                          | *                     | Short follow-up (45 days)                   | * 10.7% lost to follow-up        | <b>7</b><br><b>Good quality</b>   |

**Thresholds for converting the Newcastle-Ottawa scales to AHRQ standards (good, fair, and poor):**

**Good quality:** 3 or 4 stars in selection domain AND 1 or 2 stars in comparability domain AND 2 or 3 stars in outcome/exposure domain

**Fair quality:** 2 stars in selection domain AND 1 or 2 stars in comparability domain AND 2 or 3 stars in outcome/exposure domain

**Poor quality:** 0 or 1 star in selection domain OR 0 stars in comparability domain OR 0 or 1 stars in outcome/exposure domain
